# Supplementary material for: High-sensitivity polarization-independent terahertz Taichi-like micro-ring sensors based on toroidal dipole resonance for concentration detection of Aβ protein
Source: Nanophotonics. 2023 Feb 24;12(6):1177–87. doi: 10.1515/nanoph-2023-0010 (PMC11501499; doi:10.1515/nanoph-2023-0010)
Supplement: Supplementary file 1 — Supplementary Material Details [file j_nanoph-2023-0010_suppl_001.docx]

**High-sensitivity polarization-independent terahertz** **Taichi-like micro-ring sensors based on toroidal dipole resonance for concentration detection of Aβ protein**

Wencan Liua,b, Xinwei Zhoua,b, Shucai Zoua, Zhengguang Hua, Yun Shena, Mengqiang Caib, Dongdong Linc, Jia Zhoub, Xiaohua Denga,b, Tianjin Guo b** and Jiangtao Leia,b*

aDepartment of Physics, School of Physics and Materials Science, Nanchang University, Xuefu Avenue 999, Nanchang City 330031, China

bInstitute of Space Science and Technology, Nanchang University, Xuefu Avenue 999, Nanchang City 330031, China

cDepartment of Physics and Qian Xuesen Collaborative Research Center of Astrochemistry and Space Life Sciences, Ningbo University, Ningbo, Zhejiang 315211, China

The authors declare no competing financial interest.

*Corresponding author: Jiangtao Lei, E-mail: jiangtaolei@ncu.edu.cn;

**Corresponding author: Tianjin Guo, E-mail: tianjin@ncu.edu.cn.

**This material contains three supplemental figures.**


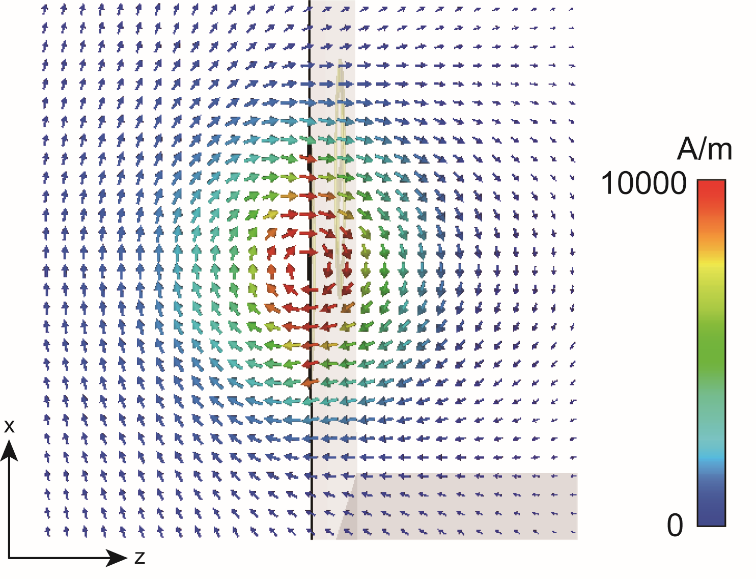


**Figure S1.** The magnetic field in the XZ plane。

**Fabrication of quadruple** **taichi ring (QTR) metasurface**

Figure S2 shows the fabrication of a quadruple taichi ring (QTR) metasurface. First, a PI film was fixed on a 500 µm thickness silicon slab by Ploydimethysiloxane (PDMS). Second, a layer of 200 nm thick Cu was deposited on the PI film by conventional electron-beam evaporation. Then, positive photoresist (SUN-115P) was coated on the PI film via the spin-coating method with a spin speed of 3000 rpm for 30 s and subsequently was baked at 100 ◦C for the 60 s. Next, direct laser writing lithography was used to expose the photoresist. The structure was baked at 100 ◦C for 90 s and placed into SUN-238D developer for 5 s. The exposed Cu was etched by reactive ion etching. Finally, photoresist residue was removed by using the acetone solution, and a flexible PI with quadruple taichi ring (QTR) metasurface was peeled off from the silicon slab.


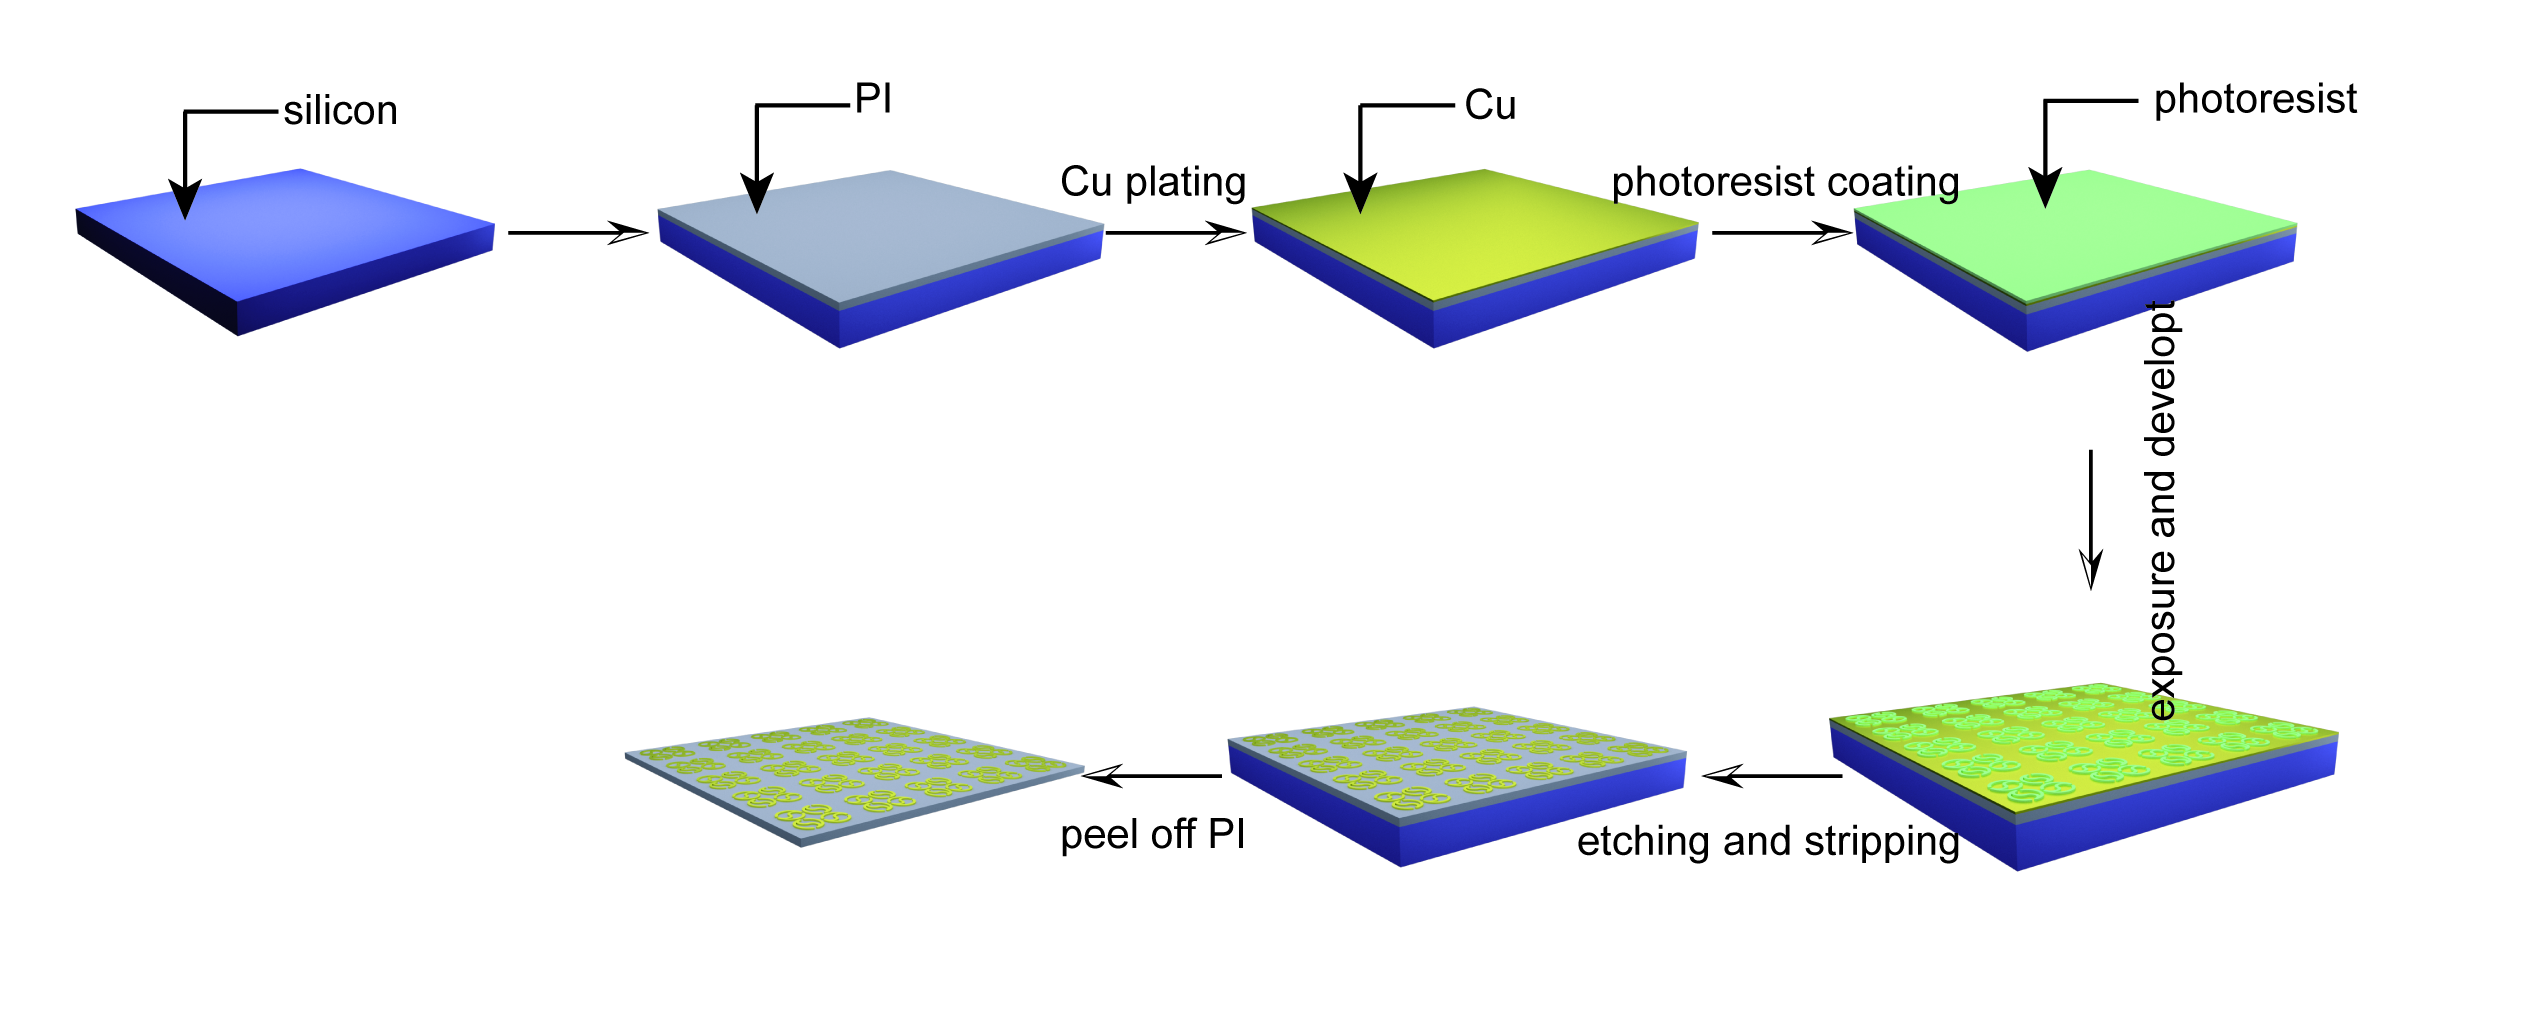


**Figure S2.** Fabrication of quadruple taichi ring (QTR) metasurface.


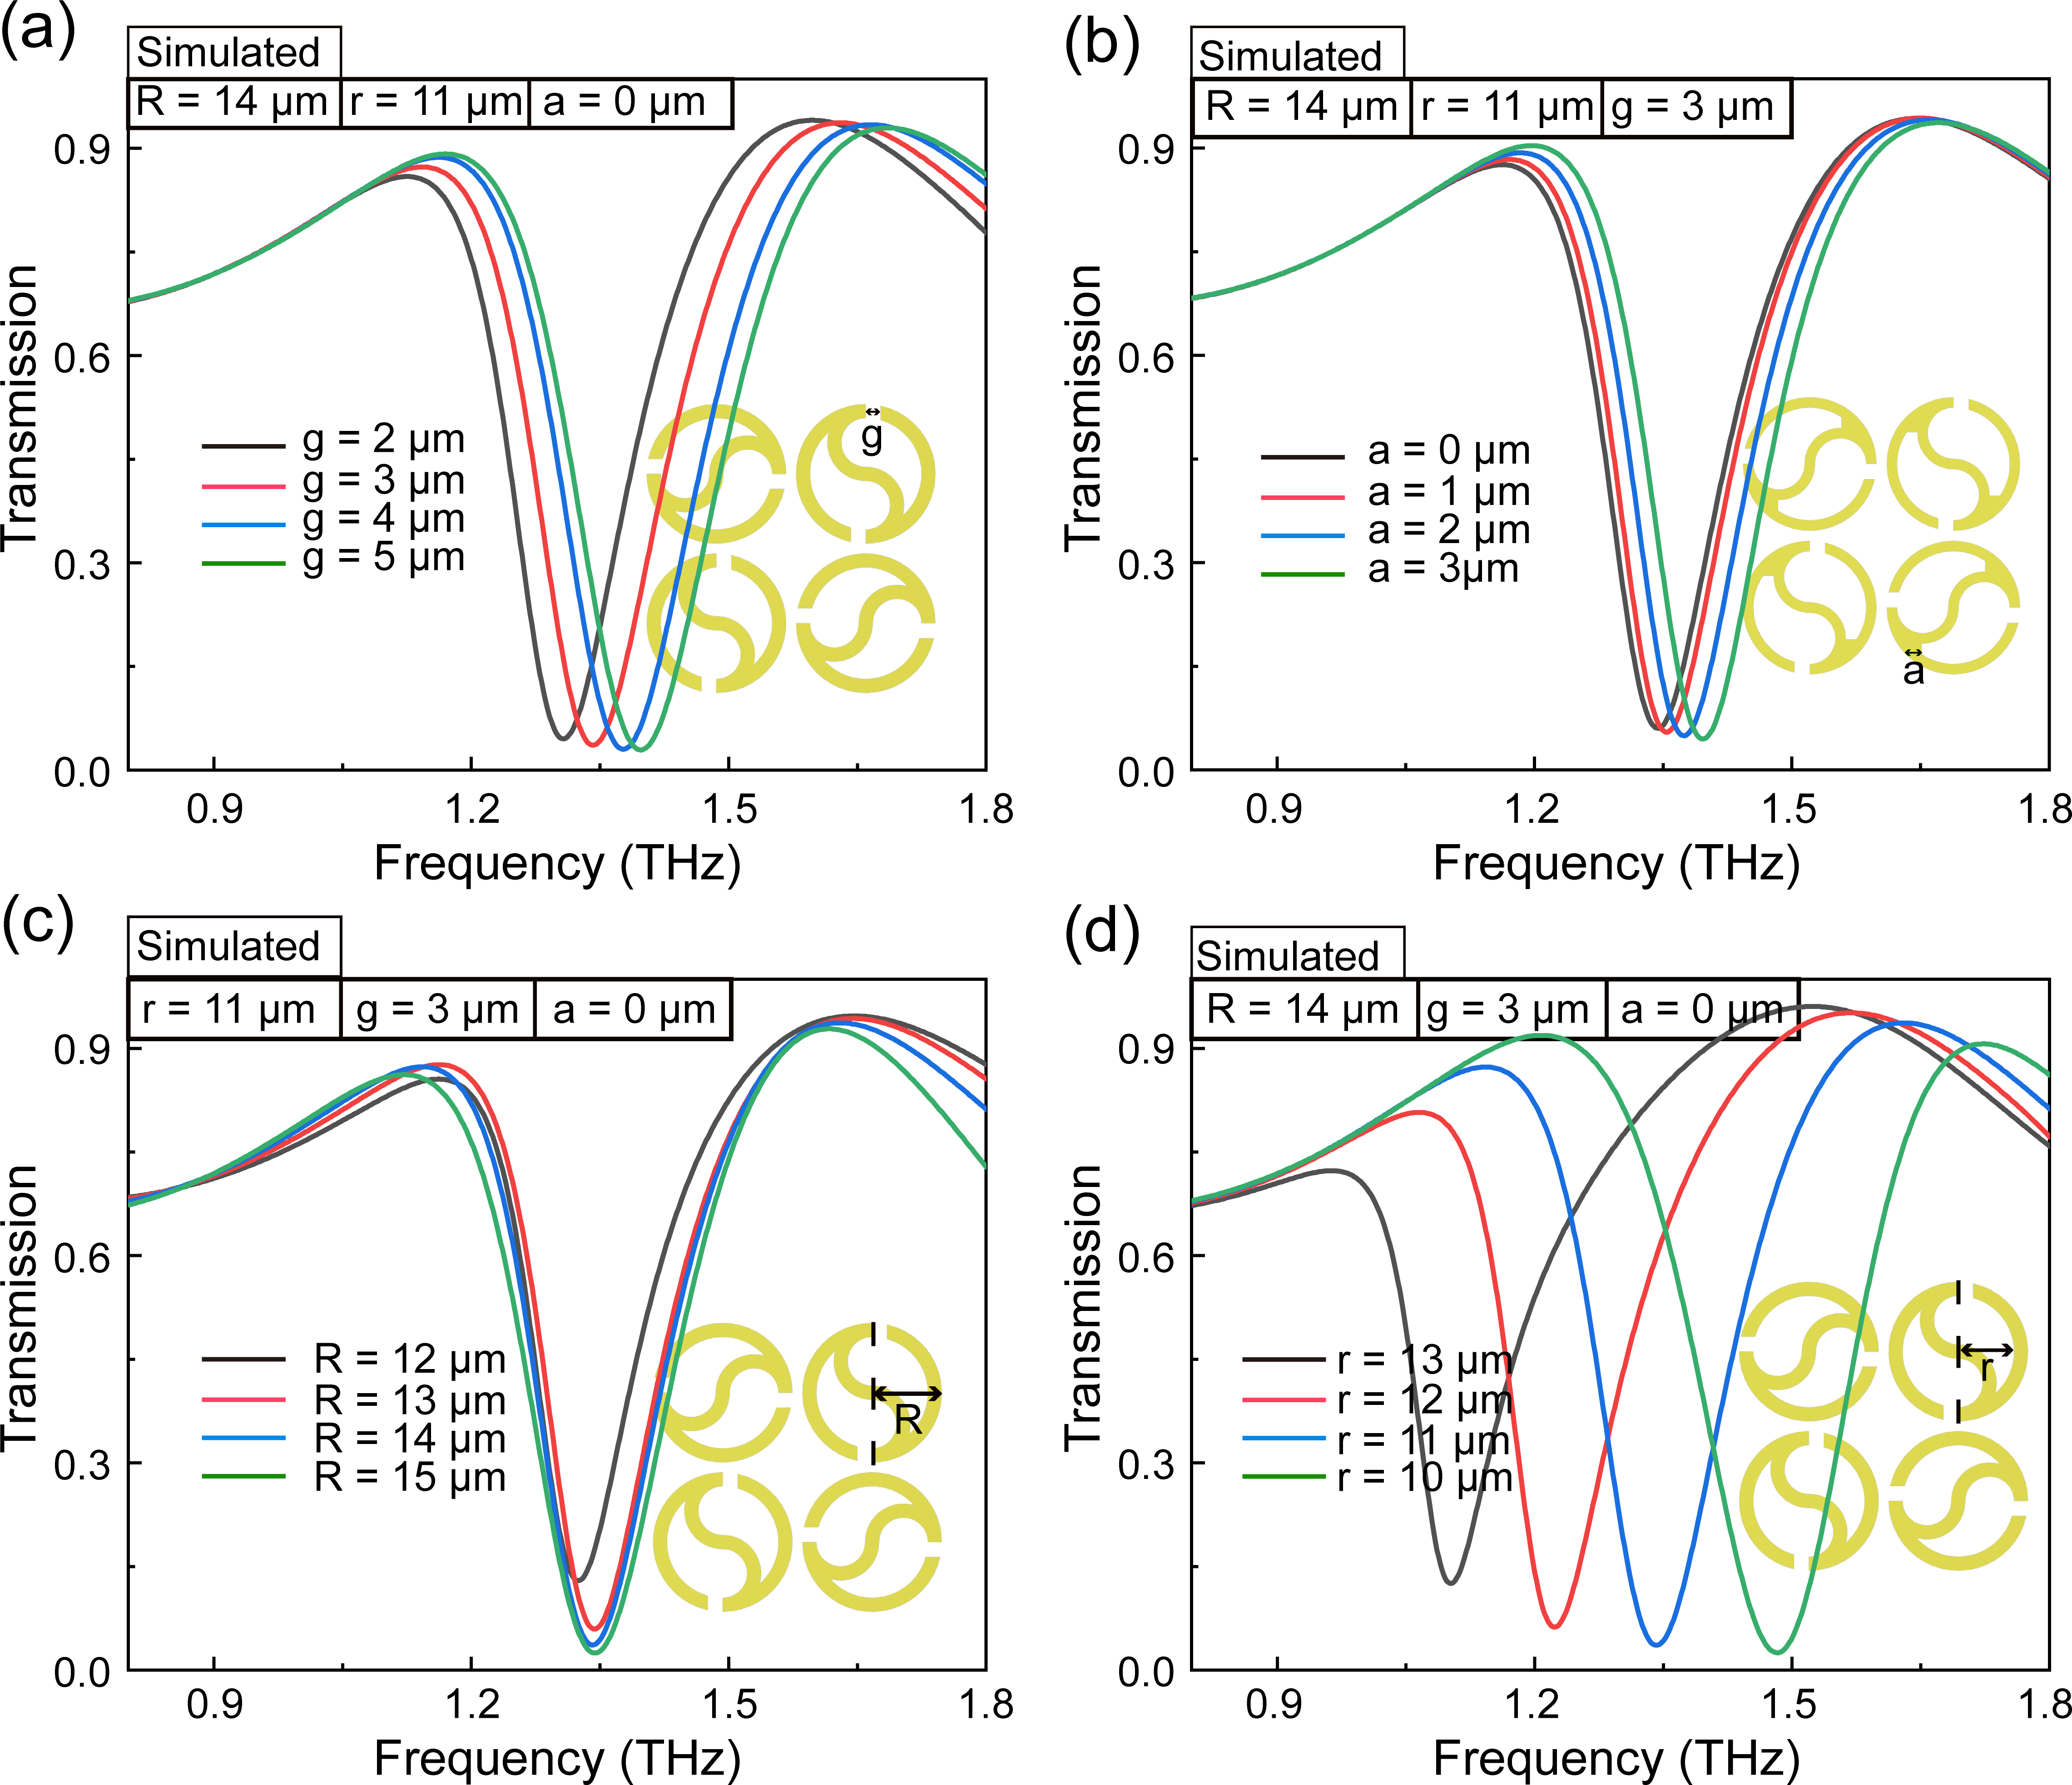


**Figure S3.** The simulated transmission spectra of QTR metasurface with the variation of(a) split gap. (b) the sharpness of the tail. (c) outer radius. (d) inner radius, respectively.

**Preparation of Aβsamples**

Highly purified (purity > 95%) full-length Aβ(residues 1~40) was obtained from Hangzhou Chinese Peptide Company. The Aβ solutions with 10 mg/ml concentration were prepared in pure water solution (pH 7.1) at room temperature. The solution was then gradually diluted to 1 mg/ml, 0.1 mg/ml, 0.01 mg/ml, and 0.001 mg/ml. The Aβ solutions are added to the surface of the structure in metamaterials and then are quick-freezed at -80 °C after five-minute waiting. They finally are freeze-dried at -20 °C in vacuum.
